1           **Nicotinic modulation insecticides act on diverse**  
2           **receptor subtypes with distinct subunit compositions**

3   Wanjun Lu<sup>1#</sup>, Zhihan Liu<sup>1#</sup>, Xinyu Fan<sup>1#</sup>, Xinzhong Zhang<sup>2#</sup>, Xiaomu Qiao<sup>1</sup> and  
4   Jia Huang<sup>1\*</sup>

5

6   <sup>1</sup>Ministry of Agriculture Key Laboratory of Molecular Biology of Crop Pathogens  
7   and Insects, Institute of Insect Sciences, Zhejiang University, Hangzhou 310058,  
8   China;

9   <sup>2</sup>Tea Research Institute, Chinese Academy of Agricultural Sciences, Hangzhou  
10   310008, China

11

12   #These authors contributed equally.

13   \*Jia Huang.       **Email:** [huangj@zju.edu.cn](mailto:huangj@zju.edu.cn)

14

15   **Author Contributions:** J.H. designed the study. W.L., Z.L., X.F. and X.Z.  
16   performed experiments. X.M. and J.H. analyzed data and wrote the manuscript.

17

18 **Keywords:** neonicotinoid, nicotinic acetylcholine receptor, resistance,  
19 insecticide, *Drosophila*

20 **Abstract**

21 Insect nicotinic acetylcholine receptors (nAChRs) are ligand gated ion channels  
22 mainly expressed in the central nervous system of insects. They are the directed  
23 targets of nicotinic modulation insecticides including neonicotinoids, the most  
24 widely used insecticides in the world. However, the resistance development from  
25 pests and the negative impacts on the pollinators affect their applications and  
26 create demand for the alternatives. Thus, it is very important to understand the  
27 mode of action of these insecticides at the molecular level, which is actually  
28 unclear for more than 30 years. In this study, we systematically examined the  
29 susceptibility of ten *Drosophila melanogaster* nAChR subunits mutants against  
30 eleven nicotinic modulation insecticides. Our results showed that there are  
31 several subtypes of nAChRs with distinct subunits compositions that are  
32 responsible for the toxicity of different insecticides, respectively. At least three of  
33 them are the major molecular targets of seven structurally similar neonicotinoids  
34 *in vivo*. On the other hand, the spinosyns may exclusively act on the  $\alpha 6$   
35 homomeric nAChR but not any other heteromeric pentamers. Behavioral assays

36 using thermogenetic tools further confirmed the bioassay results and support the  
37 idea that receptor activation rather than inhibition leads to the insecticidal effects  
38 of neonicotinoids. The present findings reveal native nAChR subunit interactions  
39 with various insecticides and have important implications for resistance  
40 management and the development of novel insecticides targeting this important  
41 ion channels.

42

### 43 **Author Summary**

44 The neonicotinoids and spinosyns make up about 27% of the insecticides by world  
45 market value. Novel insecticides like sulfoxaflor, flupyradifurone and  
46 triflumezopyrim are developed as alternatives due to the negative effects of  
47 neonicotinoids on pollinators. Although all act via insect nicotinic acetylcholine  
48 receptors, the mode of action is unclear. Our work shows that these insecticides  
49 act on diverse receptor subtypes with distinct subunit compositions. This finding

50 could lead to the development of more selective insecticides to control pests with  
51 minimal effects on beneficial insects.

52

## 53 **Main Text**

### 54 **Introduction**

55 Chemical insecticides have been wildly used to control pests in agriculture,  
56 horticulture, forestry, homes and cities. They have also played a vital role in  
57 preventing the spread of human and animal vector-borne diseases. However,  
58 Insecticide resistance is a serious worldwide problem for invertebrate pest  
59 control, with more than 600 different insect and mite species having become  
60 resistant to at least one insecticide. In addition, there is at least one documented  
61 case of resistance for more than 335 insecticides/acaricides[1]. Therefore, there  
62 is great demand for effective insecticide resistance management (IRM) and  
63 development of new pest control compounds. To address both issues, we need  
64 to know the mode of action of insecticides: the process of how an insecticide  
65 works at a molecular level [2].

66 A complete understanding of the mode of action of an insecticide requires  
67 knowledge of how it affects a specific target site within an organism. Although  
68 most insecticides have multiple biological effects, toxicity is usually attributed to a

69 single major effect. For many insecticides, however, the exact molecular targets  
70 remain elusive. In order to ascribe whether a candidate protein is indeed the  
71 target for an insecticidal effect *in vivo*, it is not sufficient to demonstrate an *in vitro*  
72 biochemical interaction between an insecticide and a protein. Genetic evidence  
73 demonstrating an effect due to mutation of the candidate target is critical before it  
74 is possible to conclude that a given protein is the target of an insecticide.

75 The neonicotinoids (acetamiprid, clothianidin, dinotefuran, imidacloprid,  
76 nitenpyram, thiacloprid, and thiamethoxam) are remarkably effective to control  
77 agricultural pests, ectoparasites and arthropod vectors [3]. They are taken up by  
78 the roots or leaves and translocated to all parts of the plant due to high systemic  
79 activity, making them effectively toxic to wide range of sap-feeding and foliar  
80 feeding insects. Thus, neonicotinoids account for 24% of the global insecticide  
81 market, the largest market share of all chemical classes[1]. They act selectively  
82 on insect nicotinic acetylcholine receptors (nAChR) as agonists compared with  
83 the mammalian-selective nicotine. The spinosyns are a naturally derived, unique  
84 family of macrocyclic lactones which act on insect nAChR in an allosteric fashion.  
85 Besides, the sulfoximine sulfoxaflor, butenolide flupyradifurone and mesoionic  
86 triflumezopyrim are three newly developed insecticides which are also nAChR  
87 competitive modulators [4]. It is expected that the market of all above nAChR

88 targeting insecticides which show excellent insect to mammalian selectivity, will  
89 continue to grow. However, the molecular targets of neonicotinoids and other  
90 nAChR modulators remain unclear, mainly because we do not know the structure  
91 and assembly of native nAChRs in insects [5].

92 The cation-selective nAChRs are members of the Cys-loop ligand gated ion  
93 channel superfamily responsible for rapid excitatory neurotransmission. The  
94 functional nAChRs are homo- or heteromeric pentamers of structurally related  
95 subunits arranged around a central ion-conducting pore[6]. Each subunits has a  
96 extracellular N-terminal domain which contains six distinct regions (loops A–F)  
97 involved in ligand binding, four C-terminal transmembrane segments (TM1–TM4)  
98 and an intracellular loop between TM3 and TM4. nAChRs are divided into  $\alpha$ -  
99 subunits possessing two adjacent cystine residues in loop C, while those  
100 subunits without this motif are termed non- $\alpha$  subunits. In vertebrates, 17 nAChR  
101 subunits have been identified, which can co-assemble to generate a diverse  
102 family of nAChR subtypes with different pharmacological properties and  
103 physiological functions. Insects have fewer nAChR subunits (10–12 subunits)  
104 according to the available genome data. Although co-immunoprecipitation  
105 studies have indicated potential associations of several subunits, the exact  
106 subunits composition of native insect nAChRs remains unknown[5]. Unlike the

107 vertebrate counterparts, heterologous expression of genuine arthropod  $\alpha$  and  $\beta$   
108 subunits has not been successful until recently two groups found that three  
109 ancillary proteins are essential for robust expression of arthropod nAChR  
110 heteromers [7, 8]. Thus for a long time, researchers used hybrid receptors with  
111 insect  $\alpha$  subunits and mammalian/avian  $\beta$  subunits to study the interaction of  
112 insecticides and receptors. Such alternatives may not faithfully reflect all features  
113 of the native nAChRs [9].

114 In this study, we systematically examined the effects of total ten (seven  $\alpha$   
115 and three  $\beta$ ) *Drosophila melanogaster* subunit mutants against eleven different  
116 nAChR targeting insecticides. We found that there are multiply subtypes of  
117 receptors with distinct subunits compositions which are responsible for the  
118 toxicity of different insecticides, respectively. Artificial activation/inhibition of  
119 subunit-expressing neurons also mimicked insecticides poisoning symptoms in  
120 pests. The elucidation of molecular targets of these economically important  
121 agrochemicals and the assembly of native nAChRs will be very helpful for  
122 resistance management and ecotoxicological evaluation on beneficial insects like  
123 predators and pollinators.

124

## 125 **Results**

### 126 **Generation of nAChR $\beta$ 1<sup>R81T</sup> mutant**

127 We got all 10 nAChRs knock-out mutants from Yi Rao's lab and found that  
128 KO of  $\alpha$ 4 and  $\beta$ 1 was homozygous lethal. Thus we used a point mutation  
129 (T227M) allele of  $\alpha$ 4 (*redeye, rye*) in bioassays, which is a dominant-negative  
130 mutation to cause reduced sleep phenotype in flies [10]. An R81T mutation of the  
131 nAChR  $\beta$ 1 was found in neonicotinoids-resistant peach aphids and later in cotton  
132 aphids [11, 12], so we introduced the homologous mutation into the  $\beta$ 1 of  
133 *Drosophila melanogaster* with CRISPR-Cas9-mediated homology-directed repair  
134 (HDR). The design of gRNA target site and HDR template was shown and the  
135 screen of successful R81T knock-in was accreted under imidacloprid selection  
136 pressure and confirmed by direct DNA sequencing (Figure 1 and S1).

137

### 138 **nAChR mutants showed distinct resistance to multiple insecticides**

139 We tested the effects of 10 nAChR mutants and some heterozygous  
140 mutants against 11 insecticides (Figure 2 and Table S1-11). The  $\alpha$ 1 mutant  
141 showed moderate levels of resistance to imidacloprid, thiacloprid, acetamiprid  
142 and triflumezopyrim, the LC<sub>50</sub> resistance ratio (RR) is about 13.5 - 88.0. Its



143 heterozygous mutant also showed low levels of resistance to these insecticides.  
144 Besides, it showed a low but statistically significant increases of RR (2.7 - 3.7) to  
145 thiamethoxam, clothianidine, dinotefuran and nitenpyram. The  $\alpha 2$  mutant also  
146 showed similar levels of resistance (17.2 - 48.5 in the terms of RR) to  
147 imidacloprid, thiacloprid and triflumezopyrim. For the  $\alpha 3$  mutant, it showed small  
148 RR increases (2.7 - 5.5) to thiamethoxam, clothianidine, dinotefuran, nitenpyram,  
149 sulfoxaflor and flupyradifurone. The  $\alpha 4$ ,  $\alpha 5$ ,  $\alpha 6$ ,  $\alpha 7$  and  $\beta 3$  mutants are sensitive  
150 to almost all the tested insecticides, the obvious exception is that the  $\alpha 6$   
151 homozygous mutant is resistant to spinetoram with a RR of 42.8 but the  
152 heterozygous mutant is close to the wild type (RR 1.2). The  $\beta 1$  mutant exhibited  
153 medium to high resistance to all insecticides (23.9 - 398.3 in the terms of RR)  
154 except spinetoram, and its heterozygous mutant showed small increases of RR  
155 for most insecticides. The resistance profile of  $\beta 2$  mutant is similar to that of  $\alpha 1$   
156 mutant, with 13.0 - 84.3 folds RR increases to imidacloprid, thiacloprid,  
157 acetamiprid and triflumezopyrim.

158 Both  $\alpha 1$  and  $\beta 1$  mutants showed variable resistance to multiply insecticides,  
159 thus we generated a  $\alpha 1/\beta 1$  double mutant with recombination. However, the  
160 eggs laid by this combined mutant can not hatch for further experiments. A

161 recent paper also generated a  $\beta 1$  R81T *Drosophila* and found that it has serious  
162 defects in reproduction and locomotion [13], however, the  $\beta 1$  mutant we made  
163 here did not show any significant fitness cost (Figure S2). The sequences of  $\alpha 5$ ,  
164  $\alpha 6$  and  $\alpha 7$  are very close and show high similarity to the vertebrate nAChR  $\alpha 7$   
165 subunit. They can also form heteromeric ion channels in vitro with different  
166 combinations like  $\alpha 5/\alpha 6$ ,  $\alpha 5/\alpha 7$  and  $\alpha 5/\alpha 6/\alpha 7$  [14]. Since only the  $\alpha 6$  mutant  
167 showed resistance to spinetoram, we then wonder whether there is a genetic  
168 redundancy among these evolutionarily conserved gene. However, the  $\alpha 5/\alpha 7$   
169 double mutant was still sensitive to spinetoram (Table S11), indicating that the  $\alpha 6$   
170 homomeric channel could be the solo target for spinosyns.

171

## 172 **Hyperactivating/silencing nAChR-expressing neurons mimics insecticides** 173 **poisoning symptoms**

174 The way insects react when they are exposed to neonicotinoids, sulfoxaflor,  
175 flupyradifurone and spinosyns are similar. The early-onset behaviors including  
176 hyperactivity, convulsion, uncoordinated movements, leg extension and tremors.  
177 At higher doses, these excitatory symptoms can induce severe tremors and  
178 complete paralysis that lead to death [15-17]. We then wondered whether

179 artificial activation of *nAChR*-expressing neurons would induce insecticides-like  
180 poisoning symptoms. Thus, we used the thermosensitive cation channel  
181 *Drosophila* TRPA1 to acutely hyper-stimulate these neurons with all available  
182 *nAChR* KI-Gal4 strains [18]. We found that expressing *trpA1* in *nAChR* $\alpha$ 1<sup>2A-</sup>  
183 <sup>GAL4</sup>, *nAChR* $\alpha$ 2<sup>2A-GAL4</sup>, *nAChR* $\alpha$ 3<sup>2A-GAL4</sup>, *nAChR* $\alpha$ 6<sup>2A-GAL4</sup> and *nAChR* $\beta$ 2<sup>2A-GAL4</sup>  
184 neurons strongly induced hyperactivity behavior at 32 °C, and eventually led to  
185 paralysis (Figure 3A, Video 1), which is similar to the above-mentioned  
186 symptoms. However, activation of *nAChR* $\beta$ 3<sup>2A-GAL4</sup> neurons did not show any  
187 behavioral defects . These results parallel the above bioassay data that the  
188 deletion of  $\alpha$ 1,  $\alpha$ 2,  $\alpha$ 3,  $\alpha$ 6 and  $\beta$ 2 caused medium to high resistances to these  
189 insecticides respectively. Therefore, thermogenetic activation of some *nAChR*-  
190 expressing neurons in a short time window phenocopies the action of  
191 insecticides in target pests, which demonstrates that *in vivo* pharmacological  
192 activation of these subunits-containing nAChRs leads to toxicity and finally death.

193 The poisoning symptoms associated with triflumezopyrim is distinct from  
194 other nicotinic modulation insecticides since it inhibits rather than activates insect  
195 nAChRs. There is no any neuro-excitatory symptoms after treatment of  
196 triflumezopyrim, on the contrary, it induces lethargic poisoning characterized by

197 slow but coordinated leg movements and insects became less responsive to  
198 stimuli over time [19]. Thus, we chose to use *UAS-Shibire<sup>ts</sup>* to inhibit *nAChR*-  
199 *expressing* neurons [20]. As expected, *nAChR $\alpha$ 1<sup>2A-GAL4</sup>*, *nAChR $\alpha$ 2<sup>2A-GAL4</sup>* and  
200 *nAChR $\beta$ 2<sup>2A-GAL4</sup>* neurons produced a “sluggish” behavior rather than hyperactivity  
201 (Figure 3B). The flies exhibited almost no translational or rotational body  
202 movement (Video 1). Silencing of *nAChR $\alpha$ 3<sup>2A-GAL4</sup>* and *nAChR $\alpha$ 6<sup>2A-GAL4</sup>* neurons  
203 also produced similar behaviors, further confirming that the  $\alpha$ 3- and  $\alpha$ 6-  
204 containing nAChRs can not be blocked by triflumezopyrim, otherwise both  
205 mutants would show resistance in bioassays.

206

### 207 **Expression patterns of nAChRs in KO mutants**

208 We confirmed that the KO coding regions were not detected or barely  
209 detectable with real-time PCR quantification (Figure S2). There was no big  
210 difference of expression levels of each subunits in these mutant flies, except that  
211 the  $\beta$ 3 was relatively less transcribed than other genes. For the  $\alpha$ 1 heterozygous  
212 mutant, the mRNA levels of all subunits were almost same as the wild type  
213 control.

214

### 215 **Discussion**

216 The Insecticide Resistance Action Committee (IRAC) classifies neonicotinoids,  
217 sulfoximines, butenolides and mesoionics into sub-groups 4A, 4C, 4D and 4E  
218 respectively, according to their chemical similarity relations. However, our results  
219 clearly showed that sulfoxaflor and flupyradifurone may specifically act on the  
220 same nAChR subtype which consists of  $\alpha 3$  and  $\beta 1$  subunits (Figure 4A), albeit  
221 their big differences in chemical structures. More importantly, we found that the  
222 neonicotinoids act on distinct nAChR subtypes and such selectivity is not  
223 dependent on the aromatic heterocyclic (A), or the electron-withdrawing nitro or  
224 cyano moiety (X-Y) which is considered the key toxophore. Interestingly, the ring  
225 systems and the  $R_2$  substituents in the open-chain structures are the determining  
226 factors (Figure 4). For example, the  $\alpha 1$ ,  $\alpha 2$ ,  $\beta 1$  and  $\beta 2$  mutants showed similar  
227 levels of resistance to imidacloprid and thiacloprid (both have a five-membered  
228 ring), indicating that they mainly act on the same  $\alpha 1/\alpha 2/\beta 1/\beta 2$  pentamer (Figure  
229 4B). This is consistent with previous ex vivo recording results [21] and the two  
230 recent reconstituted studies in which both drugs act as partial agonists on the  
231  $\alpha 1/\alpha 2/\beta 1/\beta 2$  nAChR [7, 8]. Acetamiprid is structurally similar to thiacloprid with  
232 the cyanoimine pharmacophore, but the acyclic configuration changes its  
233 molecular target in vivo. It may act on the  $\alpha 1/\beta 1/\beta 2$  nAChR and again the  
234 electrophysiological studies had already indicated that acetamiprid is nearly a full

235 agonist [21] and its potency on the recombinant louse  $\alpha 1/\alpha 2/\beta 1/\beta 2$  nAChR is  
236 about 860 fold lower than that of thiacloprid [8]. Although thiamethoxam has a  
237 six-membered-ring, it is a pro-drug without intrinsic nAChR activity until  
238 metabolized to the active form clothianidine in plants and insects [22]. Therefore,  
239 thiamethoxam, clothianidine, dinotefuran and nitenpyram can be considered as  
240 the same type which have the N-methy substitution in the R<sub>2</sub> position and mainly  
241 act on the  $\alpha 1/\alpha 3/\beta 1$  nAChR (Figure 4B). The neonicotinoids are traditionally  
242 divided into nitroimines (NNO<sub>2</sub>), nitromethylenes (CHNO<sub>2</sub>) or cyanoimines  
243 (NCN), but our findings proposed a new classification according to their major  
244 nAChR subtypes targets.

245       Despite the widespread use of neonicotinoids for almost four decades, the  
246 first and only field-evolved target-site resistance mutation (R81T in nAChR $\beta 1$ )  
247 was reported in 2011 and it has only been found in two species to date [11, 12].  
248 Such unusual phenomenon can be partially explained by our findings that the  
249 seven neonicotinoids have at least three distinct molecular targets in vivo. To  
250 some extent, the continuous use of different neonicotinoids is a kind of  
251 spontaneous insecticides rotations, which has been proven to be effective in  
252 mitigating or delaying resistance. New nicotine mimic insecticides like sulfoxaflor  
253 and flupyradifurone mainly act on another nAChR subtype which is distinct from

254 neonicotinoids (Figure 4), indicating their potential use in insecticides resistance  
255 management.

256 Electrophysiological studies with native tissues or recombinant receptors  
257 showed that low concentrations of neonicotinoids can block nAChR while higher  
258 concentrations cause receptor activation[7, 23]. Therefore, it is still unclear  
259 whether the insecticidal activity is the consequence of nAChR inhibition or  
260 activation in vivo. We found that transient artificial activation rather than inhibition  
261 of *nAChR*-expressing neuron is sufficient to induce neonicotinoids-like poisoning  
262 symptoms in flies (Figure 3). Thus, the overall effect of neonicotinoids is neuronal  
263 depolarizing by activation of nAChR which is more physiologically relevant.

264 Triflumezopyrim is the first member of a new class of mesoionic insecticides,  
265 which act via inhibition of the orthosteric binding site of the nAChR [19]. We  
266 found that the  $\alpha 1/\alpha 2/\beta 1/\beta 2$  nAChR could be its major target like imidacloprid and  
267 thiacloprid, all these mutants showed high resistance to triflumezopyrim (Figure  
268 4A). This is consistent with radioligand binding results in which triflumezopyrim  
269 potently displacing [<sup>3</sup>H]imidacloprid with a  $K_i$  value of 43 nM using the membrane  
270 preparations from the aphid [19]. Thermogenetic inhibition neurons expressing  
271  $\alpha 1$ ,  $\alpha 2$  and  $\beta 2$  also mimic the lethargic intoxication symptoms (Figure 3B). Thus,  
272 in order to maintain the durability and effectiveness of this new powerful tool for

273 control of hopper species in rice, it is very critical to avoid repeated use of  
274 triflumezopyrim with imidacloprid and thiacloprid.

275 The spinosyns including spinosad and spinoteram have been shown to act a  
276 population of nAChR that are not targeted by neonicotinoids, the binding site is  
277 also distinct to the orthosteric site [4]. The  $\alpha 6$  subunit has been proposed as the  
278 main target of spinosyns since the resistance to spinosad in many insects is  
279 associated with loss-of-function mutations in the  $\alpha 6$  gene [24], however, whether  
280 other subunits are involved is still unknown. We used spinoteram in bioassays  
281 and the results strongly indicated that spinosyns may specifically act on the  $\alpha 6$   
282 homomeric nAChR but not any other subtypes (Figure 4), which is consistent  
283 with a recent report using spinosad [25]. Thermogenetic activation of  $\alpha 6$ -  
284 expressing neurons also induced spinosyns-like poisoning symptoms in flies.

285 Our current knowledge about the subunit composition of insect nAChRs is  
286 very limited. Immunoprecipitation data with subunit-specific antibodies showed  
287 that the *Drosophila*  $\alpha 3$  and  $\beta 1$  co-assemble within the same receptor complex  
288 [26]. Further studies from the same group indicated that  $\alpha 1/\alpha 2/\beta 2$  and  $\beta 1/\beta 2$  may  
289 co-assemble into the same receptor complex respectively [27]. Similar studies  
290 using the brown planthopper suggested that there are two populations of  
291 nAChRs which contain the *Drosophila* equivalent subunits combinations



292  $\alpha1/\alpha2/\beta1$  and  $\alpha3/\beta1/\beta2$ , respectively [28]. These previous findings are partially  
293 confirmed by the present results, as the  $\alpha3/\beta1$ ,  $\alpha1/\alpha3/\beta1$ ,  $\alpha1/\beta1/\beta2$  and  
294  $\alpha1/\alpha2/\beta1/\beta2$  could be the major receptor subtypes for the tested insecticides,  
295 indicating that the  $\beta1$  subunit could be an indispensable component for all  
296 heteromeric pentamers (Figure 4). Besides, we noticed that for some  
297 insecticides, different subunits mutations contribute in an asymmetrical manner  
298 to resistance (Figure 4A). Therefore, there could be functional redundancy  
299 between some  $\alpha$ -type subunits and we can not exclude the existence of other  
300 potential receptor subtypes such as  $\alpha1/\beta1$  and  $\alpha3/\beta1/\beta2$ . The diversity of insect  
301 nAChRs and their druggability make them remain an extremely important target  
302 for insecticides development.

303 Growing evidence indicates that sublethal doses of neonicotinoids like  
304 imidacloprid, thiamethoxam and clothianidin negatively affect wild and managed  
305 bees which are important pollinators in ecosystems and agriculture [29-31]. They  
306 reduce reproduction and colony development, perhaps by impairing foraging,  
307 homing and nursing behaviors of bees [32]. These severe sublethal effects have  
308 led to heavy restrictions on the use of above three neonicotinoids in Europe to  
309 protect pollinators [33]. The sulfoxaflor and flupyradifurone are potential  
310 alternatives for neonicotinoids, however, their risk to bees is controversial [34-

311 36]. Therefore, it is critical to understand the mode of action of these insecticides  
312 inside bees. Since most *Drosophila* nAChR subunit genes (except  $\alpha 5$  and  $\beta 3$ )  
313 have one-to-one orthologs in the honeybee and bumblebee genomes [7], the  
314 expression and assembly of receptors could be conserved between flies and  
315 bees, suggesting that our results will enable further studies about the  
316 ecotoxicology and risk assessment for these nAChR modulators.

317

318

## 319 **Materials and Methods**

### 320 **Insecticides**

321 Imidacloprid (600g/LSC, Bayer CropScience, Germany), thiamethoxam (70%GZ,  
322 Syngenta, China), clothianidin (48%SC, HeNan Hansi crop protection, China),  
323 dinotefuran (20%SG, Mitsui Chemicals, Japan), nitenpyram (30%WG, ZinGrow,  
324 China), acetamiprid (20%SP, Noposion, China), thiacloprid (40%SC, Limin  
325 Chemical, China), sulfoxaflor (22%SC, Dow AgroSciences, USA), flupyradifurone  
326 (17%SC, Bayer CropScience, Germany), triflumezopyrim (10%SC, DuPont,  
327 USA), spinetoram (60g/LSC, Dow AgroSciences, USA) and triton X-100  
328 (Sangon Biotech, China) were purchased commercially.

329

330 **Fly strains**

331 Flies were maintained and reared on conventional cornmeal-agar-molasses  
332 medium at  $25 \pm 1$  °C,  $60\% \pm 10\%$  humidity with a photoperiod of 12 hours light:  
333 12 hours night. For experiments using *UAS-trpA1* and *UAS-Shibire<sup>ts</sup>* transgenes,  
334 flies were reared at 21 °C. The following stains were sourced from the  
335 Bloomington Stock Center (Indiana University): *vas-cas* (#51323), *UAS-trpA1*  
336 (#26263), *UAS-Shibire<sup>ts</sup>* (44222). All nAChR KO mutants and KI-Gal4 strains  
337 were gifts from Dr. Yi Rao (Deng et al., 2019) (Peking University). The *w<sup>1118</sup>* used  
338 for outcrossing was used as wide-type for insecticide bioassays.

339

340 We generated the nAChR $\beta$ 1<sup>R81T</sup> mutant by CRISPR/Cas9 genome editing. The  
341 gRNA sequence (3L:4433329~4433352, ATCAAACGTTTGGTTAACTTTAG)  
342 was designed with flyCRISPR Target Finder (<https://flycrispr.org/target-finder/>)  
343 and cloned into the pDCC6 plasmid (addgene #59985). A 110 bp ssODN (single-  
344 strand oligodeoxynucleotide) was customer synthesized as the donor template to  
345 replace the targeted genomic region. This ssODN contained three nucleotides  
346 changes with two (CG to AC) conferring the R81T mutation and one synonymous

347 mutation (G to A) to prevent the re-cleavage from Cas9 after incorporation. Both  
348 gRNA plasmid and ssODN were microinjected into the embryos of *vas-cas* flies  
349 (BL #51323). The crossing and selection scheme was shown in the Figure S1.

350

### 351 **Insecticide bioassays**

352 3–5 day old and uniform size adult females were used in insecticide bioassays to  
353 assess the susceptibility of different fly strains. The testing method was modified  
354 from the IRAC susceptibility test method 026 (<https://irac-online.org/methods/>).  
355 Briefly, the required serial dilutions of insecticide solution are prepared in 200g/L  
356 sucrose using formulated insecticides. Approximately 5ml of insecticide solution  
357 is required for each concentration. A piece of dental wick (1cm) is placed in a  
358 standard *Drosophila* vials and treated with 800  $\mu$ L 20% aqueous sucrose with or  
359 without insecticide. The vials were kept upside down until all flies became active  
360 to avoid flies getting trapped in the dental wick. The bioassay was assessed after  
361 48 h, dead flies as well as seriously affected flies displaying no coordinated  
362 movement, that were unable to walk up the vial, or unable to get to their feet  
363 were cumulatively scored as 'affected'. The lethal concentrations  $LC_{50}$  were  
364 calculated by probit analysis using the Polo Plus software (LeOra Software,

365 Berkeley, CA, USA). Non-linear log dose-response curves were generated in  
366 Graphpad Prism 8.21 (Graphpad Software Inc., La Jolla, CA, USA).

367

### 368 **Thermogenetic activation and silencing assays**

369 Flies for TRPA1-mediated thermogenetic activation and Shibire-mediated  
370 silencing experiments were collected upon eclosion and reared in vials  
371 containing standard food medium at 21 °C for 5-8 days. For thermogenetic  
372 activation with the *UAS-trpA1* transgene, 10 flies were transferred to new empty  
373 vials by gently inspiration, and then the assays were performed at 23 °C and  
374 32 °C for 10 minutes. The percentage of paralysis behavior, in which the animal  
375 lies on its back with little effective movement of the legs and wings, was  
376 measured. For silencing assays, *UAS-Shibire<sup>ts</sup>* transgene was used and flies  
377 were also transferred to fly vials at 23 °C and 32 °C for 10 minutes.

378

### 379 **Real-time quantitative PCR**

380 The relative transcription levels of *nAChRs* in different KO mutants were  
381 examined using real-time quantitative PCR performed with an CFX96TM Real-  
382 Time PCR System (Bio-rad, Hercules, USA). Total RNA was isolated with Trizol  
383 reagent according to the manufacturer's instructions. Residual genomic DNA was  
384 removed by RQ1 RNase-Free DNase (Promega). Total RNA was reverse  
385 transcribed to cDNA with the EasyScript First-Strand cDNA Synthesis SuperMix  
386 (Transgene, Beijing, China). qPCR with gene-specific primers was performed  
387 with the ChamQ Universal SYBR qPCR Master Mix (Vazyme, Nanjing, China) to  
388 investigate relative expression levels of different *nAChRs*. The *RpL32* (ribosomal  
389 protein L32) was used as an internal control. Relative expression of *nAChRs*  
390 were normalized to the reference (*RpL32*) using the  $2^{-\Delta\Delta CT}$  method.

391

## 392 **Fecundity and development assays**

393 10 pairs of freshly emerged couples of wild type control and  $\beta 1^{R81T}$  mutant were  
394 transferred into vials containing normal food for 72 hr. These files were then  
395 transferred into a new dish which is used for egg-laying assay. The numbers of  
396 egg laid in each dishes were recorded after 24 hr. To calculate the larvae to  
397 pupae rate, 60 second-instar larvae were collected and transferred into a new

398 vial as one group. The numbers of pupae in each vial were recorded after 7 days  
399 in an incubator. Each genotypes were repeated for at least three times with  
400 duplicates.

401

## 402 **Climbing assay**

403 About three-day-old male flies were collected with CO<sub>2</sub> anesthesia into groups of  
404 10, and then allowed to recover for 2 days. A climbing tube consisted of two vials  
405 with 90 mm height and 20 mm diameter. The flies were filmed for 30 s with a  
406 SONY HDR-CX900E camera. The climbing index (percentage of flies in the  
407 upper half of the vial) were determined at 5 s intervals, after the flies had been  
408 tapped down to the bottom of the vials.

409

## 410 **Acknowledgments**

411 This work was supported by the National Natural Science Foundation of China  
412 (31802019, 32072496) and Zhejiang Provincial Fund for Distinguished Young  
413 Scholars (LR19C140002). We thank Yi Rao (Peking University) for fly stocks.

414

415

## 416 **References**

- 417 1. Sparks TC, Crossthwaite AJ, Nauen R, Banba S, Cordova D, Earley F, et al.  
418 Insecticides, biologics and nematicides: Updates to IRAC's mode of action classification -  
419 a tool for resistance management. *Pestic Biochem Physiol.* 2020;167:104587. Epub  
420 2020/06/13. doi: 10.1016/j.pestbp.2020.104587. PubMed PMID: 32527435.
- 421 2. Casida JE, Bryant RJ. The ABCs of pesticide toxicology: amounts, biology, and  
422 chemistry. *Toxicol Res (Camb).* 2017;6(6):755-63. doi: 10.1039/c7tx00198c. PubMed  
423 PMID: 30090540; PubMed Central PMCID: PMC6062263.
- 424 3. Jeschke P, Nauen R, Beck ME. Nicotinic Acetylcholine Receptor Agonists: A  
425 Milestone for Modern Crop Protection. *Angew Chem Int Edit.* 2013;52(36):9464-85. doi:  
426 10.1002/anie.201302550. PubMed PMID: WOS:000323474600015.
- 427 4. Crossthwaite AJ, Bigot A, Camblin P, Goodchild J, Lind RJ, Slater R, et al. The  
428 invertebrate pharmacology of insecticides acting at nicotinic acetylcholine receptors. *J*  
429 *Pestic Sci.* 2017;42(3):67-83. Epub 2017/08/20. doi: 10.1584/jpestics.D17-019. PubMed  
430 PMID: 30363948; PubMed Central PMCID: PMC6183333.
- 431 5. Matsuda K, Ihara M, Sattelle DB. Neonicotinoid Insecticides: Molecular Targets,  
432 Resistance, and Toxicity. *Annu Rev Pharmacol Toxicol.* 2020;60:241-55. Epub  
433 2020/01/10. doi: 10.1146/annurev-pharmtox-010818-021747. PubMed PMID:  
434 31914891.
- 435 6. Casida JE. Neonicotinoids and Other Insect Nicotinic Receptor Competitive  
436 Modulators: Progress and Prospects. *Annu Rev Entomol.* 2018;63:125-44. Epub  
437 2018/01/13. doi: 10.1146/annurev-ento-020117-043042. PubMed PMID: 29324040.



- 438 7. Ihara M, Furutani S, Shigetou S, Shimada S, Niki K, Komori Y, et al. Cofactor-  
439 enabled functional expression of fruit fly, honeybee, and bumblebee nicotinic receptors  
440 reveals picomolar neonicotinoid actions. *Proc Natl Acad Sci U S A*. 2020;117(28):16283-  
441 91. Epub 2020/07/03. doi: 10.1073/pnas.2003667117. PubMed PMID: 32611810;  
442 PubMed Central PMCID: PMC7368294.
- 443 8. Rufener L, Kaur K, Sarr A, Aaen SM, Horsberg TE. Nicotinic acetylcholine  
444 receptors: Ex-vivo expression of functional, non-hybrid, heteropentameric receptors  
445 from a marine arthropod, *Lepeophtheirus salmonis*. *PLoS Pathog*. 2020;16(7):e1008715.  
446 Epub 2020/07/28. doi: 10.1371/journal.ppat.1008715. PubMed PMID: 32716968;  
447 PubMed Central PMCID: PMC7419010.
- 448 9. Ihara M, Buckingham SD, Matsuda K, Sattelle DB. Modes of Action, Resistance  
449 and Toxicity of Insecticides Targeting Nicotinic Acetylcholine Receptors. *Curr Med Chem*.  
450 2017;24(27):2925-34. Epub 2017/02/09. doi: 10.2174/0929867324666170206142019.  
451 PubMed PMID: 28176635.
- 452 10. Shi M, Yue Z, Kuryatov A, Lindstrom JM, Sehgal A. Identification of Redeye, a new  
453 sleep-regulating protein whose expression is modulated by sleep amount. *Elife*.  
454 2014;3:e01473. Epub 2014/02/06. doi: 10.7554/eLife.01473. PubMed PMID: 24497543;  
455 PubMed Central PMCID: PMC3912633.
- 456 11. Bass C, Puinean AM, Andrews M, Cutler P, Daniels M, Elias J, et al. Mutation of a  
457 nicotinic acetylcholine receptor beta subunit is associated with resistance to  
458 neonicotinoid insecticides in the aphid *Myzus persicae*. *Bmc Neuroscience*. 2011;12. doi:  
459 Artn 51  
460 10.1186/1471-2202-12-51. PubMed PMID: WOS:000291969900001.

- 461 12. Shi XG, Zhu YK, Xia XM, Qiao K, Wang HY, Wang KY. The mutation in nicotinic  
462 acetylcholine receptor beta 1 subunit may confer resistance to imidacloprid in *Aphis*  
463 *gossypii* (Glover). *J Food Agric Environ*. 2012;10(2):1227-30. PubMed PMID:  
464 WOS:000305310800064.
- 465 13. Homem RA, Buttery B, Richardson E, Tan Y, Field LM, Williamson MS, et al.  
466 Evolutionary trade-offs of insecticide resistance — The fitness costs associated with  
467 target-site mutations in the nAChR of *Drosophila melanogaster*. *Molecular Ecology*.  
468 2020;29(14):2661-75. doi: 10.1111/mec.15503.
- 469 14. Lansdell SJ, Collins T, Goodchild J, Millar NS. The *Drosophila* nicotinic  
470 acetylcholine receptor subunits  $\alpha 5$  and  $\alpha 7$  form functional homomeric and  
471 heteromeric ion channels. *BMC Neurosci*. 2012;13:73. Epub 2012/06/26. doi:  
472 10.1186/1471-2202-13-73. PubMed PMID: 22727315; PubMed Central PMCID:  
473 PMC3444433.
- 474 15. Salgado VL. Studies on the mode of action of spinosad: Insect symptoms and  
475 physiological correlates. *Pesticide Biochemistry and Physiology*. 1998;60(2):91-102. doi:  
476 DOI 10.1006/pest.1998.2332. PubMed PMID: WOS:000074891100003.
- 477 16. Watson GB, Loso MR, Babcock JM, Hasler JM, Letherer TJ, Young CD, et al. Novel  
478 nicotinic action of the sulfoximine insecticide sulfoxaflor. *Insect Biochem Molec*.  
479 2011;41(7):432-9. doi: 10.1016/j.ibmb.2011.01.009. PubMed PMID:  
480 WOS:000293041200003.
- 481 17. Nauen R, Jeschke P, Velten R, Beck ME, Ebbinghaus-Kintscher U, Thielert W, et al.  
482 Flupyradifurone: a brief profile of a new butenolide insecticide. *Pest Management*  
483 *Science*. 2015;71(6):850-62. doi: 10.1002/ps.3932. PubMed PMID:  
484 WOS:000354035100009.

- 485 18. Hamada FN, Rosenzweig M, Kang K, Pulver SR, Ghezzi A, Jegla TJ, et al. An  
486 internal thermal sensor controlling temperature preference in *Drosophila*. *Nature*.  
487 2008;454(7201):217-20. doi: 10.1038/nature07001. PubMed PMID: 18548007; PubMed  
488 Central PMCID: PMC2730888.
- 489 19. Cordova D, Benner EA, Schroeder ME, Holyoke CW, Jr., Zhang W, Pahutski TF, et  
490 al. Mode of action of triflumezopyrim: A novel mesoionic insecticide which inhibits the  
491 nicotinic acetylcholine receptor. *Insect Biochem Mol Biol*. 2016;74:32-41. Epub  
492 2016/05/01. doi: 10.1016/j.ibmb.2016.04.008. PubMed PMID: 27130855.
- 493 20. Kitamoto T. Conditional disruption of synaptic transmission induces male-male  
494 courtship behavior in *Drosophila*. *Proc Natl Acad Sci U S A*. 2002;99(20):13232-7. doi:  
495 10.1073/pnas.202489099. PubMed PMID: 12239352; PubMed Central PMCID:  
496 PMC130616.
- 497 21. Tan J, Galligan JJ, Hollingworth RM. Agonist actions of neonicotinoids on nicotinic  
498 acetylcholine receptors expressed by cockroach neurons. *Neurotoxicology*.  
499 2007;28(4):829-42. doi: 10.1016/j.neuro.2007.04.002. PubMed PMID:  
500 WOS:000248875500014.
- 501 22. Nauen R, Ebbinghaus-Kintscher U, Salgado VL, Kausmann M. Thiamethoxam is a  
502 neonicotinoid precursor converted to clothianidin in insects and plants. *Pesticide*  
503 *Biochemistry and Physiology*. 2003;76(2):55-69. doi: 10.1016/s0048-3575(03)00065-8.
- 504 23. Salgado VL. Selective actions of insecticides on desensitizing and non-  
505 desensitizing nicotinic acetylcholine receptors in cockroach (*Periplaneta americana*)  
506 neurons. *Pest Management Science*. 2021;77(8):3663-72. doi: 10.1002/ps.6396.  
507 PubMed PMID: WOS:000643154400001.

- 508 24. Zuo YY, Xue YX, Wang ZY, Ren X, Aioub AAA, Wu YD, et al. Knockin of the G275E  
509 mutation of the nicotinic acetylcholine receptor (nAChR) alpha 6 confers high levels of  
510 resistance to spinosyns in *Spodoptera exigua*. *Insect Science*. 2021. doi: 10.1111/1744-  
511 7917.12922. PubMed PMID: WOS:000651046300001.
- 512 25. Perry T, Chen W, Ghazali R, Yang YT, Christesen D, Martelli F, et al. Role of  
513 nicotinic acetylcholine receptor subunits in the mode of action of neonicotinoid,  
514 sulfoximine and spinosyn insecticides in *Drosophila melanogaster*. *Insect Biochem Mol*  
515 *Biol*. 2021;131:103547. Epub 2021/02/07. doi: 10.1016/j.ibmb.2021.103547. PubMed  
516 PMID: 33548485.
- 517 26. Chamaon K, Schulz R, Smalla KH, Seidel B, Gundelfinger ED. Neuronal nicotinic  
518 acetylcholine receptors of *Drosophila melanogaster*: the alpha-subunit dalpha3 and the  
519 beta-type subunit ARD co-assemble within the same receptor complex. *FEBS Lett*.  
520 2000;482(3):189-92. Epub 2000/10/12. doi: 10.1016/s0014-5793(00)02057-3. PubMed  
521 PMID: 11024458.
- 522 27. Chamaon K, Smalla KH, Thomas U, Gundelfinger ED. Nicotinic acetylcholine  
523 receptors of *Drosophila*: three subunits encoded by genomically linked genes can co-  
524 assemble into the same receptor complex. *Journal of Neurochemistry*. 2002;80(1):149-  
525 57. doi: DOI 10.1046/j.0022-3042.2001.00685.x. PubMed PMID:  
526 WOS:000173059900016.
- 527 28. Li J, Shao Y, Ding Z, Bao H, Liu Z, Han Z, et al. Native subunit composition of two  
528 insect nicotinic receptor subtypes with differing affinities for the insecticide  
529 imidacloprid. *Insect Biochem Mol Biol*. 2010;40(1):17-22. Epub 2009/12/17. doi:  
530 10.1016/j.ibmb.2009.12.003. PubMed PMID: 20005950.

- 531 29. Tsvetkov N, Samson-Robert O, Sood K, Patel HS, Malena DA, Gajiwala PH, et al.  
532 Chronic exposure to neonicotinoids reduces honey bee health near corn crops. *Science*.  
533 2017;356(6345):1395-7. Epub 2017/07/01. doi: 10.1126/science.aam7470. PubMed  
534 PMID: 28663503.
- 535 30. Woodcock BA, Bullock JM, Shore RF, Heard MS, Pereira MG, Redhead J, et al.  
536 Country-specific effects of neonicotinoid pesticides on honey bees and wild bees.  
537 *Science*. 2017;356(6345):1393-5. Epub 2017/07/01. doi: 10.1126/science.aaa1190.  
538 PubMed PMID: 28663502.
- 539 31. Rundlof M, Andersson GK, Bommarco R, Fries I, Hederstrom V, Herbertsson L, et  
540 al. Seed coating with a neonicotinoid insecticide negatively affects wild bees. *Nature*.  
541 2015;521(7550):77-80. doi: 10.1038/nature14420. PubMed PMID: 25901681.
- 542 32. Crall JD, Switzer CM, Oppenheimer RL, Ford Versypt AN, Dey B, Brown A, et al.  
543 Neonicotinoid exposure disrupts bumblebee nest behavior, social networks, and  
544 thermoregulation. *Science*. 2018;362(6415):683-6. Epub 2018/11/10. doi:  
545 10.1126/science.aat1598. PubMed PMID: 30409882.
- 546 33. Cressey D. Neonics Vs Bees. *Nature*. 2017;551(7679):156-8. PubMed PMID:  
547 WOS:000414734200022.
- 548 34. Siviter H, Brown MJF, Leadbeater E. Sulfoxaflor exposure reduces bumblebee  
549 reproductive success. *Nature*. 2018;561(7721):109-12. doi: 10.1038/s41586-018-0430-6.  
550 PubMed PMID: 30111837.
- 551 35. Haas J, Zaworra M, Glaubitz J, Hertlein G, Kohler M, Lagojda A, et al. A  
552 toxicogenomics approach reveals characteristics supporting the honey bee (*Apis*  
553 *mellifera* L.) safety profile of the butenolide insecticide flupyradifurone. *Ecotoxicol*

554 Environ Saf. 2021;217:112247. Epub 2021/04/27. doi: 10.1016/j.ecoenv.2021.112247.

555 PubMed PMID: 33901780.

556 36. Tosi S, Nieh JC, Brandt A, Colli M, Fourrier J, Giffard H, et al. Long-term field-

557 realistic exposure to a next-generation pesticide, flupyradifurone, impairs honey bee

558 behaviour and survival. Commun Biol. 2021;4(1):805. Epub 2021/06/30. doi:

559 10.1038/s42003-021-02336-2. PubMed PMID: 34183763; PubMed Central PMCID:

560 PMCPMC8238954.

561

562

563 **Figures**

564

565

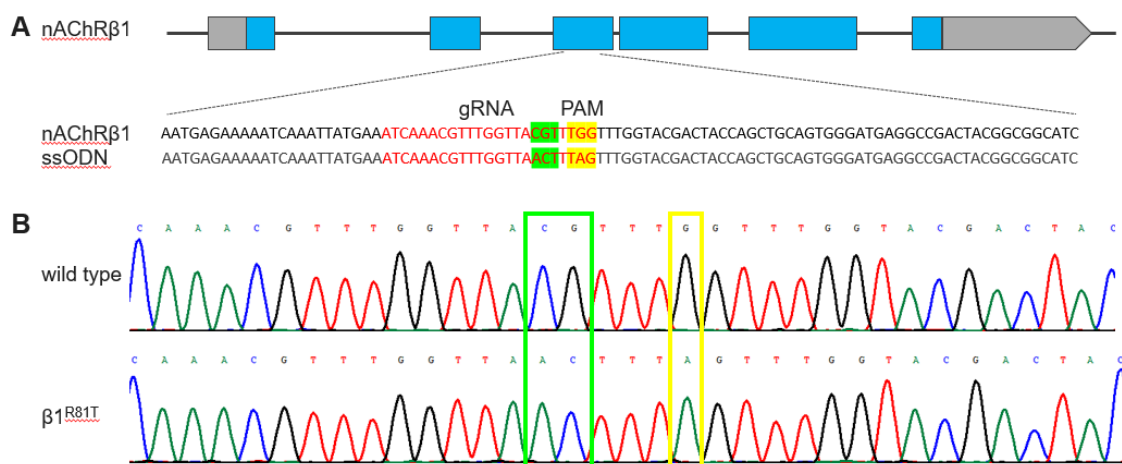

566

567

568 **Figure 1.** Generation of the nAChRβ1<sup>R81T</sup> mutant by CRISPR/Cas9 genome

569 editing. (A) Schematic of the nAChRβ1 locus and the sequence of donor

570 construct. The boxes represent exons and the coding regions are shown in blue.

571 The gRNA sequence is indicated in red and the coden for amino acid substitution

572 (CGT to ACT) is highlighted in green. One synonymous mutation (G to A) is also

573 introduced in the PAM region (in yellow) to prevent the re-cleavage from Cas9

574 after successful integration. (B) The sequence comparison between wild type

575 and point mutation flies. The nucleotides replaced are highlighted in green and

576 yellow boxex.

577

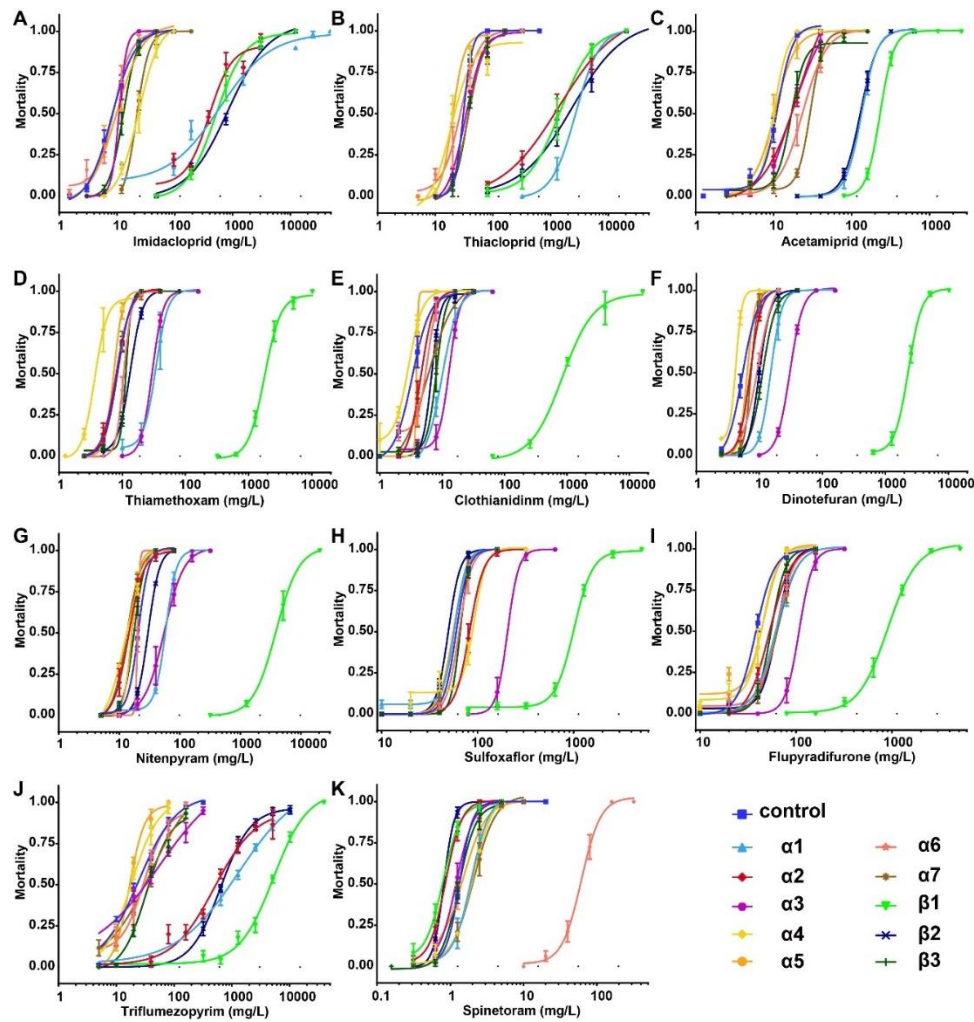

578  
579

580 **Figure 2.** Non-linear Log-dose mortality data for tested insecticides against ten  
581 *Drosophila* nAChR homozygous mutants including eight null alleles and two point  
582 mutation alleles ( $\alpha_4^{T227M}$  and  $\beta_1^{R81T}$ ). Mortality (0-1 means 0-100% in terms of  
583 percentage) of control and mutant female adults after 48 hour exposure to



584 increasing concentrations of insecticides. Error bars represent standard  
585 deviations.

586

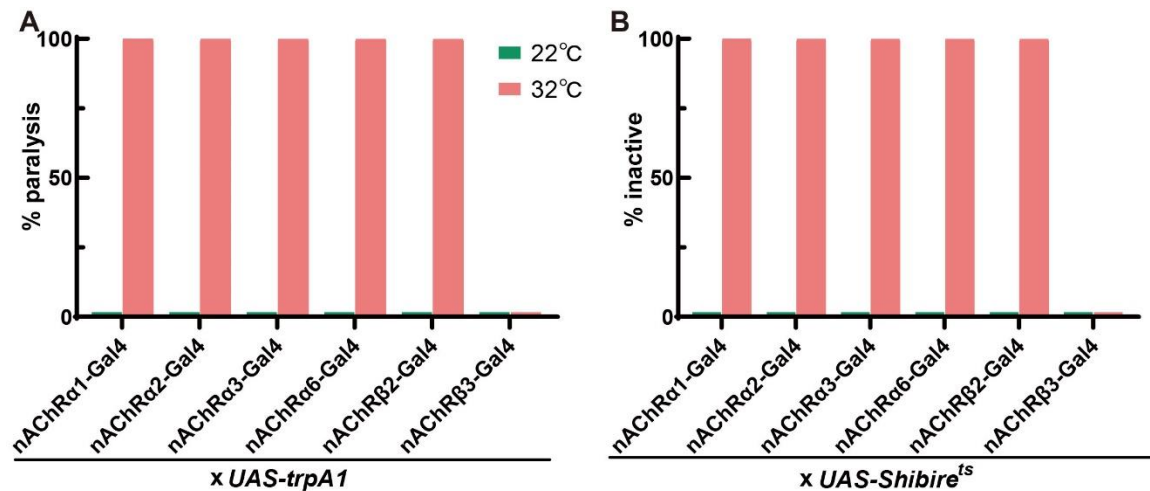

587  
588

589 **Figure 3.** The effects of artificial neuronal activation and inhibition in various  
590 *nAChR*-expressing neurons. (A) Thermogenetic activation of five *nAChR*-  
591 expressing neurons using *UAS-trpA1* induced paralysis behavior. (B)  
592 Thermogenetic silencing of five *nAChR*-expressing neurons using *UAS-Shibire<sup>ts</sup>*  
593 decreased activity. n = 30-50.

594  
595

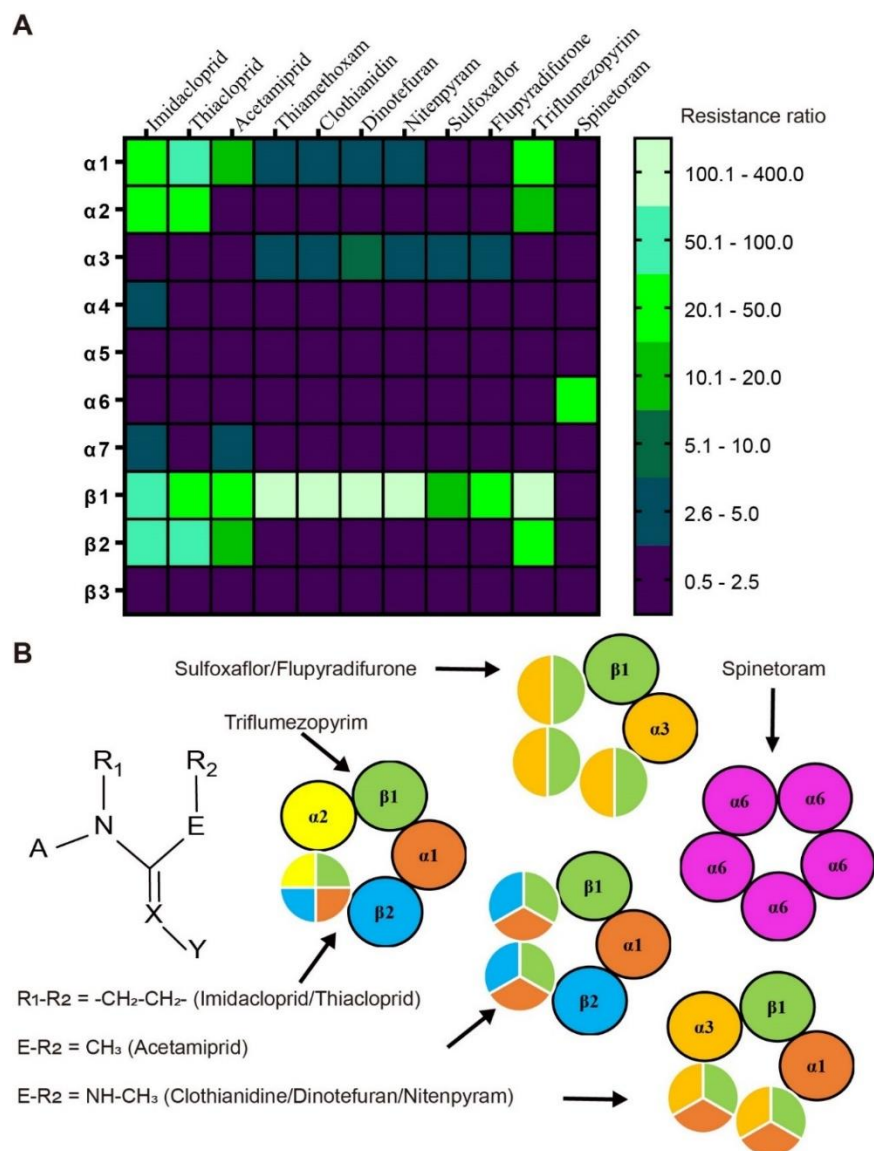

596

597 **Figure 4.** The resistance patterns of tested insecticides on different nAChR

598 mutants (A) and the proposed target receptor subtypes for neonicotinoids and

599 others (B). Various resistance ratios are grouped and represented as different

600 colors in the heatmap. Thiamethoxam is considered as a prodrug of clothianidine  
601 and not listed in the structural formula.  
602

603 **Video 1.** The effects of thermogenetic activation and inhibition in *nAChR $\alpha$ 1-*  
604 *expressing neurons. The following transgenes were used: nAChR $\alpha$ 1<sup>2A-GAL4</sup> >*  
605 *UAS-trpA1; nAChR $\alpha$ 1<sup>2A-GAL4</sup> > UAS-Shibire<sup>ts</sup>.* Other *nAChR* KI-Gal4 strains like  
606 *nAChR $\alpha$ 2<sup>2A-GAL4</sup>, nAChR $\alpha$ 3<sup>2A-GAL4</sup>, nAChR $\alpha$ 6<sup>2A-GAL4</sup> and nAChR $\beta$ 2<sup>2A-GAL4</sup>* also  
607 produced similar behaviors when stimulated under 32 °C, these videos are not  
608 shown.

## **Supplementary Information for**

# **Nicotinic modulation insecticides act on diverse receptor subtypes with distinct subunit compositions**

Wanjun Lu, Zhihan Liu, Xinyu Fan, Xinzhong Zhang, Xiaomu Qiao and Jia Huang\*

\* Jia Huang

[huangj@zju.edu.cn](mailto:huangj@zju.edu.cn)

### **This PDF file includes:**

Figures S1 to S3  
Tables S1 to S12



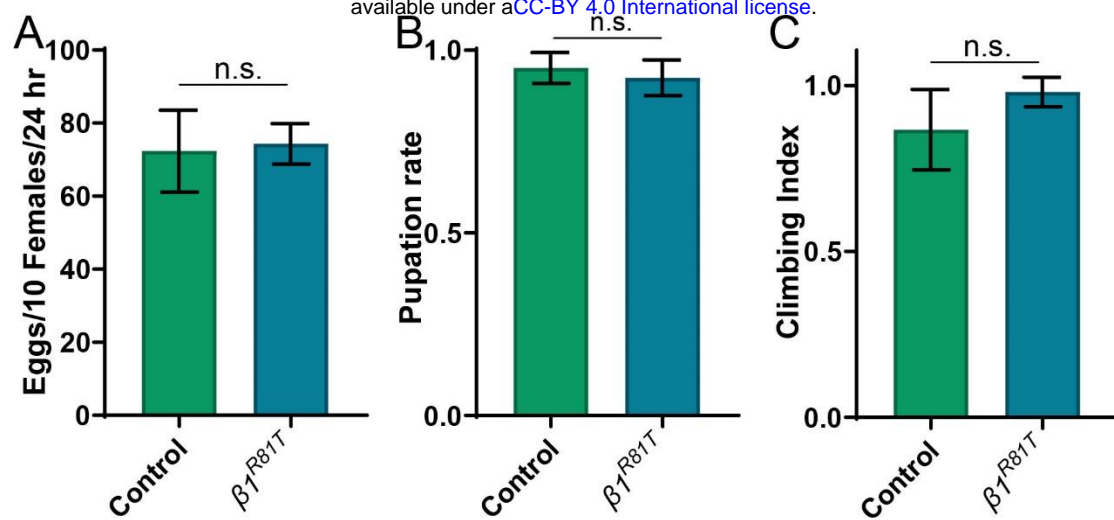

**Figure S2** Effects of  $nAChR\beta_1^{R81T}$  point mutation on number of eggs laid (A), pupation rate of larvae (B) and negative geotaxis behavior (C).

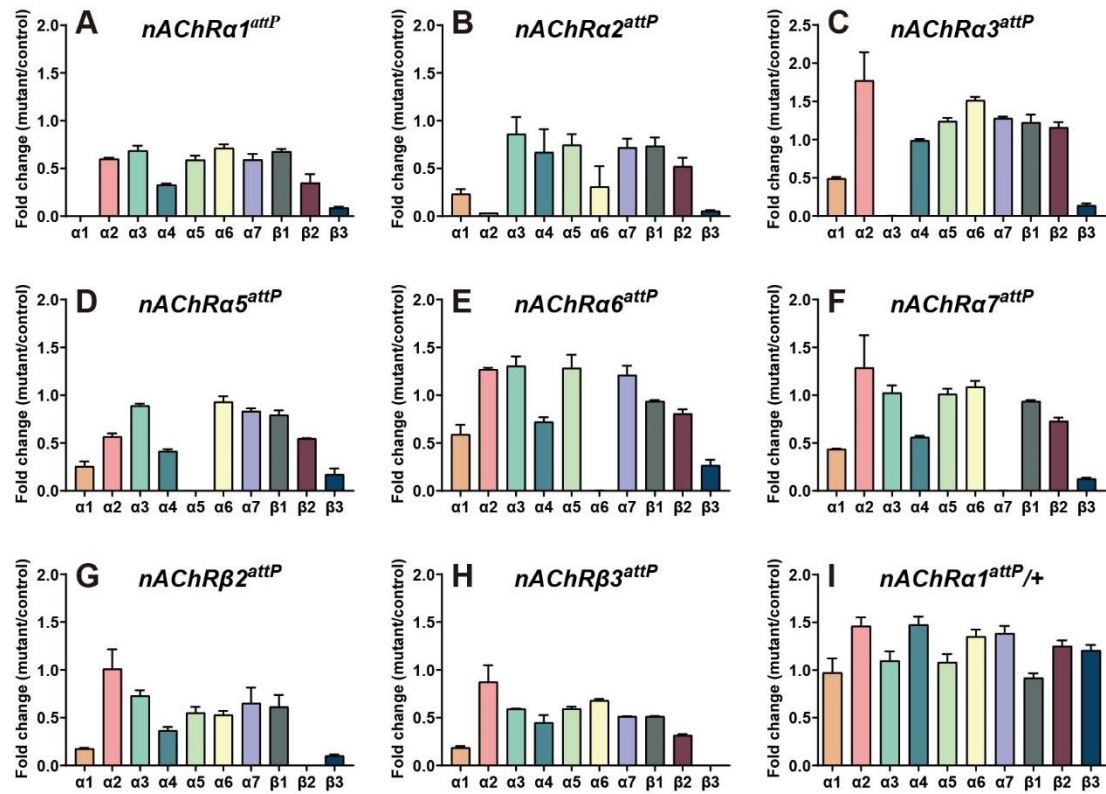

**Figure S3** Expression patterns of the nAChR genes in different KO mutants.



**Table S1 Log dose probit mortality data and resistance ratios for imidacloprid**

| Strain             | LC <sub>50</sub><br>(mg/L) | 95% CL       | LC <sub>95</sub><br>(mg/L) | 95% CL         | Resistance ratio |                  |
|--------------------|----------------------------|--------------|----------------------------|----------------|------------------|------------------|
|                    |                            |              |                            |                | LC <sub>50</sub> | LC <sub>95</sub> |
| Control            | 8.6                        | 7.5-9.9      | 26.6                       | 21.5-35.9      | 1.0              | 1.0              |
| $\alpha 1^{-/-}$   | 296.7                      | 161.4-519.4  | 14555                      | 5396.3-85114.0 | 34.5             | 547.2            |
| $\alpha 1^{+/-}$   | 150.4                      | 74.7-272.7   | 935.5                      | 456.0-5243.1   | 17.5             | 35.2             |
| $\alpha 2^{-/-}$   | 417.0                      | 254.8-686.0  | 3113.5                     | 1549.4-13500.0 | 48.5             | 117.0            |
| $\alpha 2^{+/-}$   | 52.5                       | 38.7-69.6    | 114.0                      | 82.2-259.1     | 6.1              | 4.3              |
| $\alpha 3^{-/-}$   | 10.7                       | 9.7-11.7     | 16.7                       | 14.7-21.1      | 1.2              | 0.6              |
| $\alpha 4^{T227M}$ | 22.9                       | 19.2-27.2    | 58.0                       | 45.2-86.9      | 2.7              | 2.2              |
| $\alpha 5^{-/-}$   | 9.6                        | 7.5-12.1     | 27.5                       | 19.9-50.2      | 1.1              | 1.0              |
| $\alpha 6^{-/-}$   | 7.8                        | 6.2-10.0     | 28.2                       | 19.9-49.7      | 0.9              | 1.1              |
| $\alpha 7^{-/-}$   | 22.8                       | 20.4-25.5    | 43.6                       | 37.1-55.8      | 2.7              | 1.6              |
| $\beta 1^{R81T}$   | 565.7                      | 407.3-781.4  | 2885.7                     | 1835.2-6036.1  | 65.8             | 108.5            |
| $\beta 1^{R81T/+}$ | 87.3                       | 73.8-103.4   | 210.3                      | 165.0-312.2    | 10.2             | 7.9              |
| $\beta 2^{-/-}$    | 725.4                      | 513.6-1027.5 | 4702.2                     | 2840.2-10564.0 | 84.3             | 176.8            |
| $\beta 2^{+/-}$    | 24.7                       | 21.6-28.4    | 42.3                       | 35.1-60.5      | 2.9              | 1.6              |
| $\beta 3^{-/-}$    | 13.1                       | 11.6-14.7    | 27.5                       | 23.1-35.6      | 1.5              | 1.0              |

**Table S2 Log dose probit mortality data and resistance ratios for thiacloprid**

| Strain             | LC <sub>50</sub><br>(mg/L) | 95% CL        | LC <sub>95</sub><br>(mg/L) | 95% CL         | Resistance ratio |                  |
|--------------------|----------------------------|---------------|----------------------------|----------------|------------------|------------------|
|                    |                            |               |                            |                | LC <sub>50</sub> | LC <sub>95</sub> |
| Control            | 30.4                       | 28.3-32.6     | 49.3                       | 44.6-56.7      | 1.0              | 1.0              |
| $\alpha 1^{-/-}$   | 2674.9                     | 2007.8-3553.3 | 8940.1                     | 6082.5-17994.0 | 88.0             | 181.3            |
| $\alpha 1^{+/-}$   | 89.2                       | 67.1-116.2    | 182.2                      | 134.3-394.2    | 2.9              | 3.7              |
| $\alpha 2^{-/-}$   | 1031.0                     | 783.7-1384.3  | 14812.0                    | 8693.3-31445.0 | 33.9             | 300.4            |
| $\alpha 2^{+/-}$   | 37.3                       | 31.6-43.9     | 86.2                       | 68.2-126.3     | 1.2              | 1.7              |
| $\alpha 3^{-/-}$   | 36.9                       | 31.0-43.8     | 93.4                       | 73.1-138.0     | 1.2              | 1.9              |
| $\alpha 4^{T227M}$ | 27.0                       | 16.7-40.5     | 106.2                      | 63.4-357.9     | 0.9              | 2.2              |
| $\alpha 5^{-/-}$   | 20.0                       | 16.9-23.6     | 46.7                       | 36.9-68.4      | 0.7              | 0.9              |
| $\alpha 6^{-/-}$   | 26.1                       | 22.6-29.9     | 78.5                       | 63.8-105.1     | 0.9              | 1.6              |
| $\alpha 7^{-/-}$   | 40.2                       | 33.7-47.5     | 95.3                       | 75.1-142.7     | 1.3              | 1.9              |
| $\beta 1^{R81T}$   | 1342.7                     | 802.5-2229.7  | 8533.6                     | 4418.4-32285.0 | 44.2             | 173.1            |
| $\beta 1^{R81T/+}$ | 40.3                       | 26.3-62.2     | 106.9                      | 67.4-458.1     | 1.3              | 2.2              |
| $\beta 2^{-/-}$    | 1677.8                     | 922.8-3425.5  | 21015.0                    | 8759.4-98473.0 | 54.3             | 401.8            |
| $\beta 2^{+/-}$    | 11.8                       | 8.7-14.4      | 32.5                       | 24.6-58.3      | 0.4              | 0.7              |
| $\beta 3^{-/-}$    | 39.4                       | 33.5-46.4     | 88.0                       | 70.0-128.4     | 1.3              | 1.8              |

**Table S3 Log dose probit mortality data and resistance ratios for acetamiprid**

| Strain             | LC <sub>50</sub><br>(mg/L) | 95% CL      | LC <sub>95</sub><br>(mg/L) | 95% CL      | Resistance ratio |                  |
|--------------------|----------------------------|-------------|----------------------------|-------------|------------------|------------------|
|                    |                            |             |                            |             | LC <sub>50</sub> | LC <sub>95</sub> |
| Control            | 9.7                        | 7.4-13.1    | 22.0                       | 15.5-50.7   | 1.0              | 1.0              |
| $\alpha 1^{-/-}$   | 131.3                      | 118.0-146.2 | 239.4                      | 204.7-306.1 | 13.5             | 10.9             |
| $\alpha 1^{+/-}$   | 43.6                       | 31.0-59.2   | 90.2                       | 64.7-240.8  | 4.5              | 4.1              |
| $\alpha 2^{-/-}$   | 15.2                       | 11.4-20.5   | 37.9                       | 26.2-89.1   | 1.6              | 1.7              |
| $\alpha 3^{-/-}$   | 16.9                       | 14.7-19.5   | 43.1                       | 34.5-61.8   | 1.7              | 2.0              |
| $\alpha 4^{T227M}$ | 9.4                        | 8.2-10.9    | 17.3                       | 14.2-24.8   | 1.0              | 0.8              |
| $\alpha 5^{-/-}$   | 10.1                       | 8.8-11.5    | 23.9                       | 19.7-32.0   | 1.0              | 1.1              |
| $\alpha 6^{-/-}$   | 22.6                       | 18.5-28.0   | 63.7                       | 46.6-109.0  | 2.3              | 2.9              |
| $\alpha 7^{-/-}$   | 27.4                       | 18.8-41.2   | 55.3                       | 38.0-204.6  | 2.8              | 2.5              |
| $\beta 1^{R81T}$   | 231.5                      | 214.7-249.5 | 397.7                      | 355.5-465.5 | 23.9             | 18.1             |
| $\beta 1^{R81T/+}$ | 31.2                       | 27.4-35.4   | 50.5                       | 43.0-67.6   | 3.2              | 2.3              |
| $\beta 2^{-/-}$    | 126.5                      | 109.6-146.4 | 238.3                      | 195.2-340.1 | 13.0             | 10.8             |
| $\beta 2^{+/-}$    | 24.9                       | 22.1-28.3   | 38.0                       | 32.4-51.8   | 2.6              | 1.7              |
| $\beta 3^{-/-}$    | 17.7                       | 13.5-23.3   | 55.6                       | 38.2-111.7  | 1.8              | 2.5              |

**Table S4 Log dose probit mortality data and resistance ratios for thiamethoxam**

| Strain             | LC <sub>50</sub> (mg/L) | 95% CL        | LC <sub>95</sub> (mg/L) | 95% CL        | Resistance ratio |                  |
|--------------------|-------------------------|---------------|-------------------------|---------------|------------------|------------------|
|                    |                         |               |                         |               | LC <sub>50</sub> | LC <sub>95</sub> |
| Control            | 8.2                     | 7.6-8.9       | 15.3                    | 13.4-18.4     | 1.0              | 1.0              |
| $\alpha 1^{-/-}$   | 30.5                    | 22.7-41.7     | 65.8                    | 46.6-158.5    | 3.7              | 4.3              |
| $\alpha 2^{-/-}$   | 7.9                     | 6.8-9.2       | 14.9                    | 12.2-21.2     | 1.0              | 1.0              |
| $\alpha 3^{-/-}$   | 32.9                    | 29.5-36.4     | 71.2                    | 61.6-87.1     | 4.0              | 4.7              |
| $\alpha 4^{T227M}$ | 4.1                     | 2.6-5.9       | 9.9                     | 6.6-34.8      | 0.5              | 0.6              |
| $\alpha 5^{-/-}$   | 7.3                     | 6.6-8.0       | 11.3                    | 10.0-13.6     | 0.9              | 0.7              |
| $\alpha 6^{-/-}$   | 10.8                    | 10.0-11.6     | 16.7                    | 14.8-20.4     | 1.3              | 1.1              |
| $\alpha 7^{-/-}$   | 8.2                     | 7.2-9.3       | 16.5                    | 13.7-22.1     | 1.0              | 1.1              |
| $\beta 1^{R81T}$   | 1935.5                  | 1756.0-2142.6 | 4783.9                  | 4047.9-5980.8 | 236.0            | 312.7            |
| $\beta 1^{R81T/+}$ | 18.3                    | 12.9-25.0     | 38.4                    | 27.4-97.2     | 2.2              | 2.5              |
| $\beta 2^{-/-}$    | 12.8                    | 11.0-14.9     | 25.8                    | 20.9-37.0     | 1.6              | 1.7              |
| $\beta 3^{-/-}$    | 11.8                    | 8.9-20.0      | 22.6                    | 15.4-121.0    | 1.4              | 1.5              |

**Table S5 Log dose probit mortality data and resistance ratios for clothianidin**

| Strain             | LC <sub>50</sub><br>(mg/L) | 95% CL       | LC <sub>95</sub><br>(mg/L) | 95% CL        | Resistance ratio |                  |
|--------------------|----------------------------|--------------|----------------------------|---------------|------------------|------------------|
|                    |                            |              |                            |               | LC <sub>50</sub> | LC <sub>95</sub> |
| Control            | 3.5                        | 3.1-3.9      | 8.4                        | 7.0-10.9      | 1.0              | 1.0              |
| $\alpha 1^{-/-}$   | 10.3                       | 9.2-11.4     | 20.5                       | 17.5-26.1     | 2.9              | 2.4              |
| $\alpha 2^{-/-}$   | 4.7                        | 4.3-5.2      | 8.5                        | 7.4-10.5      | 1.3              | 1.0              |
| $\alpha 3^{-/-}$   | 11.5                       | 8.1-16.7     | 25.9                       | 17.5-78.1     | 3.3              | 3.1              |
| $\alpha 4^{T227M}$ | 2.5                        | 2.1-2.9      | 6.3                        | 4.9-9.5       | 0.7              | 0.8              |
| $\alpha 5^{-/-}$   | 2.8                        | 2.5-3.2      | 4.4                        | 3.8-5.7       | 0.8              | 0.5              |
| $\alpha 6^{-/-}$   | 5.1                        | 4.6-5.7      | 9.4                        | 8.1-11.9      | 1.5              | 1.1              |
| $\alpha 7^{-/-}$   | 6.1                        | 5.3-6.9      | 17.3                       | 14.1-23.2     | 1.7              | 2.1              |
| $\beta 1^{R81T}$   | 969.4                      | 730.6-1278.8 | 4940.0                     | 3300.4-9182.5 | 277.0            | 588.1            |
| $\beta 1^{R81T/+}$ | 13.4                       | 11.8-15.2    | 21.2                       | 18.1-28.7     | 3.8              | 2.5              |
| $\beta 2^{-/-}$    | 3.4                        | 3.0-4.0      | 6.2                        | 5.2-8.6       | 1.0              | 0.7              |
| $\beta 3^{-/-}$    | 7.6                        | 7.0-8.4      | 13.5                       | 11.7-16.9     | 2.2              | 1.6              |

**Table S6 Log dose probit mortality data and resistance ratios for dinotefuran**

| Strain             | LC <sub>50</sub><br>(mg/L) | 95% CL        | LC <sub>95</sub><br>(mg/L) | 95% CL        | Resistance ratio |                  |
|--------------------|----------------------------|---------------|----------------------------|---------------|------------------|------------------|
|                    |                            |               |                            |               | LC <sub>50</sub> | LC <sub>95</sub> |
| Control            | 5.5                        | 5.2-5.9       | 11.4                       | 10.2-13.0     | 1.0              | 1.0              |
| $\alpha 1^{-/-}$   | 15.0                       | 13.6-17.0     | 25.9                       | 21.7-34.8     | 2.7              | 2.3              |
| $\alpha 2^{-/-}$   | 7.2                        | 6.5-7.9       | 12.3                       | 10.7-15.4     | 1.3              | 1.1              |
| $\alpha 3^{-/-}$   | 30.4                       | 27.6-33.2     | 55.0                       | 48.4-66.0     | 5.5              | 4.8              |
| $\alpha 3^{+/-}$   | 16.2                       | 14.1-18.7     | 29.2                       | 24.2-41.3     | 2.9              | 2.6              |
| $\alpha 4^{T227M}$ | 3.7                        | 3.2-4.3       | 7.0                        | 5.7-10.2      | 0.7              | 0.6              |
| $\alpha 5^{-/-}$   | 6.5                        | 6.0-7.2       | 9.7                        | 8.6-11.8      | 1.2              | 0.9              |
| $\alpha 6^{-/-}$   | 8.7                        | 7.8-9.8       | 16.7                       | 14.1-21.7     | 1.6              | 1.5              |
| $\alpha 7^{-/-}$   | 7.3                        | 6.7-8.0       | 10.5                       | 9.5-12.2      | 1.3              | 0.9              |
| $\beta 1^{R81T}$   | 2190.9                     | 1790.6-2702.1 | 4803.3                     | 3659.6-7985.8 | 398.3            | 421.3            |
| $\beta 1^{R81T/+}$ | 9.3                        | 8.1-10.6      | 15.6                       | 13.0-22.2     | 1.7              | 1.4              |
| $\beta 2^{-/-}$    | 10.3                       | 9.0-11.8      | 17.6                       | 14.7-24.7     | 1.9              | 1.5              |
| $\beta 3^{-/-}$    | 11.4                       | 8.0-20.6      | 23.7                       | 15.4-201.0    | 2.1              | 2.1              |

**Table S7 Log dose probit mortality data and resistance ratios for nitenpyram**

| Strain             | LC <sub>50</sub><br>(mg/L) | 95% CL        | LC <sub>95</sub><br>(mg/L) | 95% CL         | Resistance ratio |                  |
|--------------------|----------------------------|---------------|----------------------------|----------------|------------------|------------------|
|                    |                            |               |                            |                | LC <sub>50</sub> | LC <sub>95</sub> |
| Control            | 19.8                       | 17.9-22.2     | 36.6                       | 30.8-48.9      | 1.0              | 1.0              |
| $\alpha 1^{-/-}$   | 54.4                       | 43.5-69.5     | 115.2                      | 85.4-220.8     | 2.7              | 3.1              |
| $\alpha 2^{-/-}$   | 15.1                       | 13.4-17.0     | 33.1                       | 27.7-43.0      | 0.8              | 0.9              |
| $\alpha 3^{-/-}$   | 53.7                       | 44.8-64.3     | 147.3                      | 113.2-223.5    | 2.7              | 4.0              |
| $\alpha 4^{T227M}$ | 13.4                       | 11.2-15.7     | 28.9                       | 23.0-44.3      | 0.7              | 0.8              |
| $\alpha 5^{-/-}$   | 16.0                       | 14.5-17.5     | 24.7                       | 22.0-29.9      | 0.8              | 0.7              |
| $\alpha 6^{-/-}$   | 19.4                       | 16.1-24.8     | 35.4                       | 27.7-61.1      | 1.0              | 1.0              |
| $\alpha 7^{-/-}$   | 13.6                       | 12.2-15.2     | 25.9                       | 22.0-33.2      | 0.7              | 0.7              |
| $\beta 1^{R81T}$   | 3629.0                     | 2906.8-4770.6 | 11394.0                    | 7852.2-21070.0 | 183.3            | 311.3            |
| $\beta 1^{R81T/+}$ | 30.3                       | 26.6-34.7     | 51.4                       | 43.2-70.4      | 1.5              | 1.4              |
| $\beta 2^{-/-}$    | 29.6                       | 25.8-34.0     | 52.2                       | 43.4-72.6      | 1.5              | 1.4              |
| $\beta 3^{-/-}$    | 17.1                       | 15.5-19.0     | 29.6                       | 25.5-37.5      | 0.9              | 0.8              |

**Table S8 Log dose probit mortality data and resistance ratios for flupyradifurone**

| Strain             | LC <sub>50</sub><br>(mg/L) | 95% CL      | LC <sub>95</sub><br>(mg/L) | 95% CL        | Resistance ratio |                  |
|--------------------|----------------------------|-------------|----------------------------|---------------|------------------|------------------|
|                    |                            |             |                            |               | LC <sub>50</sub> | LC <sub>95</sub> |
| Control            | 38.8                       | 36.1-41.8   | 74.6                       | 66.3-87.5     | 1.0              | 1.0              |
| $\alpha 1^{-/-}$   | 59.2                       | 52.7-66.6   | 121.6                      | 102.2-157.6   | 1.5              | 1.6              |
| $\alpha 2^{-/-}$   | 53.6                       | 49.0-59.7   | 100.1                      | 85.4-127.9    | 1.4              | 1.3              |
| $\alpha 3^{-/-}$   | 108.1                      | 98.4-119.0  | 171.0                      | 150.4-208.7   | 2.8              | 2.3              |
| $\alpha 4^{T227M}$ | 33.0                       | 28.5-38.3   | 64.3                       | 52.3-92.5     | 0.9              | 0.9              |
| $\alpha 5^{-/-}$   | 34.9                       | 26.8-46.2   | 88.8                       | 62.3-187.3    | 0.9              | 1.2              |
| $\alpha 6^{-/-}$   | 55.3                       | 33.2-99.2   | 129.7                      | 79.8-1051.9   | 1.4              | 1.7              |
| $\alpha 7^{-/-}$   | 62.5                       | 57.1-68.5   | 127.0                      | 110.4-153.7   | 1.6              | 1.7              |
| $\beta 1^{R81T}$   | 842.0                      | 767.5-924.5 | 2151.2                     | 1849.8-2616.5 | 21.7             | 28.8             |
| $\beta 1^{R81T/+}$ | 81.6                       | 70.7-94.4   | 151.8                      | 124.8-214.9   | 2.1              | 2.0              |
| $\beta 2^{-/-}$    | 60.7                       | 53.1-69.3   | 102.9                      | 86.5-140.9    | 1.6              | 1.4              |
| $\beta 3^{-/-}$    | 54.5                       | 46.2-64.5   | 91.2                       | 74.5-137.6    | 1.4              | 1.2              |



**Table S9 Log dose probit mortality data and resistance ratios for sulfoxaflor**

| Strain             | LC <sub>50</sub><br>(mg/L) | 95% CL       | LC <sub>95</sub><br>(mg/L) | 95% CL        | Resistance ratio |                  |
|--------------------|----------------------------|--------------|----------------------------|---------------|------------------|------------------|
|                    |                            |              |                            |               | LC <sub>50</sub> | LC <sub>95</sub> |
| Control            | 59.4                       | 56.1-62.8    | 90.6                       | 83.9-99.9     | 1.0              | 1.0              |
| $\alpha 1^{-/-}$   | 54.8                       | 50.0-60.3    | 85.3                       | 75.3-103.2    | 0.9              | 0.9              |
| $\alpha 2^{-/-}$   | 82.0                       | 73.9-91.0    | 142.7                      | 122.8-181.6   | 1.4              | 1.6              |
| $\alpha 3^{-/-}$   | 207.8                      | 185.6-236.3  | 306.0                      | 263.2-402.5   | 3.5              | 3.4              |
| $\alpha 4^{T227M}$ | 73.0                       | 50.8-108.0   | 166.2                      | 110.7-594.5   | 1.2              | 1.8              |
| $\alpha 5^{-/-}$   | 55.7                       | 50.7-61.3    | 88.5                       | 77.9-107.6    | 0.9              | 1.0              |
| $\alpha 6^{-/-}$   | 63.0                       | 57.3-69.0    | 96.6                       | 86.0-115.7    | 1.1              | 1.1              |
| $\alpha 7^{-/-}$   | 56.6                       | 51.5-62.1    | 88.2                       | 78.0-106.2    | 1.0              | 1.0              |
| $\beta 1^{R81T}$   | 948.5                      | 726.2-1245.3 | 2280.2                     | 1628.6-4643.7 | 16.0             | 25.2             |
| $\beta 1^{R81T/+}$ | 116.3                      | 102.9-131.0  | 175.1                      | 152.0-222.1   | 2.0              | 1.9              |
| $\beta 2^{-/-}$    | 50.3                       | 46.4-54.8    | 76.2                       | 67.6-91.7     | 0.8              | 0.8              |
| $\beta 3^{-/-}$    | 64.2                       | 59.7-68.1    | 89.7                       | 83.9-98.4     | 1.1              | 1.0              |

**Table S10 Log dose probit mortality data and resistance ratios for triflumezopyrim**

| Strain             | LC <sub>50</sub><br>(mg/L) | 95% CL        | LC <sub>95</sub><br>(mg/L) | 95% CL           | Resistance ratio |                  |
|--------------------|----------------------------|---------------|----------------------------|------------------|------------------|------------------|
|                    |                            |               |                            |                  | LC <sub>50</sub> | LC <sub>95</sub> |
| Control            | 28.2                       | 24.7-31.9     | 237.0                      | 184.0-328.0      | 1.0              | 1.0              |
| $\alpha 1^{-/-}$   | 922.1                      | 756.1-1066.0  | 12856.0                    | 9343.9-19626.0   | 32.7             | 54.2             |
| $\alpha 2^{-/-}$   | 484.4                      | 266.6-985.3   | 13397.0                    | 3076.9-71026.0   | 17.2             | 56.5             |
| $\alpha 3^{-/-}$   | 36.0                       | 24.7-47.1     | 448.5                      | 278.0-1005.9     | 1.3              | 1.9              |
| $\alpha 4^{T227M}$ | 18.2                       | 13.8-22.8     | 73.4                       | 51.4-141.1       | 0.6              | 0.3              |
| $\alpha 5^{-/-}$   | 18.0                       | 1.0-15.2      | 43.3                       | 34.2-63.5        | 0.6              | 0.2              |
| $\alpha 6^{-/-}$   | 28.7                       | 24.3-34.0     | 142.5                      | 105.2-219.3      | 1.0              | 0.6              |
| $\alpha 7^{-/-}$   | 30.0                       | 24.5-37.0     | 238.1                      | 157.0-440.0      | 1.1              | 1.0              |
| $\beta 1^{R81T}$   | 4349.2                     | 3096.0-6661.3 | 33601                      | 17279.0-117310.0 | 154.0            | 141.8            |
| $\beta 2^{-/-}$    | 668.9                      | 431.0-913.5   | 5797.4                     | 3728.1-12256.0   | 23.7             | 24.5             |
| $\beta 3^{-/-}$    | 28.2                       | 24.7-31.9     | 237.0                      | 184.0-327.9      | 1.5              | 0.7              |

**Table S11 Log dose probit mortality data and resistance ratios for spinetora**

| Strain                          | LC <sub>50</sub><br>(mg/L) | 95% CL    | LC <sub>95</sub><br>(mg/L) | 95% CL      | Resistance ratio |                  |
|---------------------------------|----------------------------|-----------|----------------------------|-------------|------------------|------------------|
|                                 |                            |           |                            |             | LC <sub>50</sub> | LC <sub>95</sub> |
| Control                         | 1.3                        | 1.2-1.4   | 2.5                        | 2.2-3.1     | 1.0              | 1.0              |
| $\alpha 1^{-/-}$                | 1.8                        | 1.2-2.6   | 4.0                        | 2.7-13.5    | 1.4              | 1.6              |
| $\alpha 2^{-/-}$                | 0.8                        | 0.7-0.9   | 1.8                        | 1.5-2.3     | 0.6              | 0.7              |
| $\alpha 3^{-/-}$                | 1.2                        | 1.0-1.3   | 2.6                        | 2.2-3.5     | 0.9              | 1.0              |
| $\alpha 4^{T227M}$              | 1.8                        | 1.3-2.5   | 4.4                        | 3.0-11.1    | 1.4              | 1.8              |
| $\alpha 5^{-/-}$                | 1.4                        | 1.2-1.6   | 4.0                        | 3.2-5.6     | 1.1              | 1.6              |
| $\alpha 6^{-/-}$                | 55.6                       | 45.8-68.1 | 134.3                      | 101.8-218.1 | 42.8             | 53.7             |
| $\alpha 6^{+/-}$                | 1.6                        | 1.4-1.8   | 3.4                        | 2.9-4.5     | 1.2              | 1.4              |
| $\alpha 7^{-/-}$                | 1.8                        | 1.6-2.2   | 4.8                        | 3.8-6.7     | 1.4              | 1.9              |
| $\beta 1^{R81T}$                | 0.8                        | 0.7-0.9   | 2.1                        | 1.7-2.8     | 0.6              | 0.8              |
| $\beta 2^{-/-}$                 | 0.8                        | 0.7-0.9   | 1.3                        | 1.1-1.7     | 0.6              | 0.5              |
| $\beta 3^{-/-}$                 | 1.4                        | 1.2-1.6   | 2.9                        | 2.4-3.8     | 1.1              | 1.2              |
| $\alpha 5^{-/-};\alpha 7^{-/-}$ | 2.2                        | 1.8-2.5   | 4.5                        | 3.6-6.6     | 1.7              | 1.8              |

### Table S12 Primers used in qPCR analysis

| Primer                | Forward Sequences (5'-3') | Reverse Sequences (5'-3') |
|-----------------------|---------------------------|---------------------------|
| Ribosomal protein L32 | GACGCTTCAAGGGACAGTATCTG   | AAACGCGGTTCTGCATGAG       |
| nAChR $\alpha$ 1      | TACGTTTCGAGAAGCCCTACG     | GGGAGCCTGCAGGATAATCA      |
| nAChR $\alpha$ 2      | GGCCGCACGCAAAAAGTATC      | CAAATGTGCCACCAAGGATG      |
| nAChR $\alpha$ 3      | CTGTCCGGAActCCACAAGG      | GTCGGAGCCTGCAGGATAAT      |
| nAChR $\alpha$ 4      | CAGACGAAATAGCCGCCGTC      | ACCACAActGCCAACGTGA       |
| nAChR $\alpha$ 5      | AGACAATGCCGGCTACTTCC      | CAGCCAGCACAAAAACACGA      |
| nAChR $\alpha$ 6      | GTGGAACGACTACAATCTGCG     | AAGATACCAGGGGGCACGTA      |
| nAChR $\alpha$ 7      | CCAATGTGCTCGATATAGCGATG   | CTGTTATCCAACGCAGCTCCT     |
| nAChR $\beta$ 1       | GCAAATCCTGGCTGTTGTGC      | ACGGTTAGCAGAGTTAACAGAGTT  |
| nAChR $\beta$ 2       | GCGTGACAGCATCAGCG         | AGAGCCAGAGAAAGAAGCGG      |
| nAChR $\beta$ 3       | GGCCTGTTACGAACTACGA       | CAGACCTCGCTGGACTTCAA      |
